# Supplementary material for: Induction of Male Sterility by Targeted Mutation of a Restorer-of-Fertility Gene with CRISPR/Cas9-Mediated Genome Editing in Brassica napus L.
Source: MDPI journal article supplement (doi:10.3390/plants11243501), 2022-12-13
Supplement: s1 [file s1]

| Primer name                                                                             | Primer sequence (5'→3')                     |
|-----------------------------------------------------------------------------------------|---------------------------------------------|
| <b>The primer used in two-sgRNA vector construction</b>                                 |                                             |
| cpa-1sf                                                                                 | ATATATGGTCTCGATTGCAAGACTCAGAGGGATACGGTT     |
| cpa-1f0                                                                                 | TGCAAGACTCAGAGGGATACGGTTTTAGAGCTAGAAATAGC   |
| cpa-2r0                                                                                 | AACCCAAGACTCAGAGGGATACCAATCTCTTAGTCGACTCTAC |
| cpa-2sr                                                                                 | ATTATTGGTCTCGAAACCCAAGACTCAGAGGGATACCAA     |
| <b>The primer used for colony PCR and sequencing</b>                                    |                                             |
| U626-IDF                                                                                | TGTCCCAGGATTAGAATGATTAGGC                   |
| U629-IDR                                                                                | AGCCCTCTTCTTTCGATCCATCAAC                   |
| <b>Primers used in the present study for positive transgenic detection.</b>             |                                             |
| CPA TOP                                                                                 | TCACTGAAGATGAAGATGGGAGTGGAG                 |
| CPA BOTIM                                                                               | CGACGATCCCACTTCGCAATCTC                     |
| Cas9-F888                                                                               | ATGGCTCCGAAGAAGAAGAGGAAG                    |
| Cas9-R888                                                                               | GGCCAGGAGTTATCCAGGTCA                       |
| <b>Primers used in the present study for transgenic mutation detection</b>              |                                             |
| CPA TOP                                                                                 | TCACTGAAGATGAAGATGGGAGTGGAG                 |
| CPA BOTIM                                                                               | CGACGATCCCACTTCGCAATCTC                     |
| <b>Primers used in the present study for transgenic mutation detection based on SNP</b> |                                             |
| 13550 F CMT                                                                             | CTTACACTAGACGCTGAGAGAGATCTTGAT              |
| 13550 R CMT                                                                             | CCCACACGTCTTCACCACTCAAG                     |
| <b>Primers used in the present study for off-target Detection in BnaPPR</b>             |                                             |
| ZUN21-F                                                                                 | GGAGTGAGTACGGTGTGCGAAATAACTATCATTCTTACG     |
| ZUN21-R                                                                                 | GAGTTGGATGCTGGATGGCGGAGTCAAACCGGATTC        |
| ZUN22-F                                                                                 | GGAGTGAGTACGGTGTGCAAACAATTATCATTCTTACG      |
| ZUN22-R                                                                                 | GAGTTGGATGCTGGATGGGGTTTCAATTACGCGAGTC       |
| ZUN23-F                                                                                 | GGAGTGAGTACGGTGTGCCAATCCATACTTTCTCTTG       |
| ZUN23-R                                                                                 | GAGTTGGATGCTGGATGGCGAGAGAGACACAAGGTAG       |
| ZUN24-F                                                                                 | GGAGTGAGTACGGTGTGCCACTACATATGCATATTCTAC     |
| ZUN24-R                                                                                 | GAGTTGGATGCTGGATGGCATAAGTGAGAACAACCTTTG     |
| ZUN25-F                                                                                 | GGAGTGAGTACGGTGTGCAAGAGTTCCCAACTATCATAT     |
| ZUN25-R                                                                                 | GAGTTGGATGCTGGATGGAATATACGTTGTATCATACAA     |
| <b>Primers used in the present study positive detection of Overexpression plants</b>    |                                             |
| 35sf left                                                                               | CATTTTCATTGGAGAGGACGTCGA                    |
| 35 cpaRig.OE                                                                            | CTCCACAGCTTCAGAGACTCGAC                     |
| <b>Primers used in the present study for qRT-PCR</b>                                    |                                             |
| cpaL.OE                                                                                 | GATTGGTACGTGAGCCTCGTATCC                    |
| cpaR.OE                                                                                 | CGTGTAGAGGTCATGCGCAATC                      |
| <b>The primer used in cytoplasm identification</b>                                      |                                             |
| MSS2-L                                                                                  | CTGAAGTTGAAAAAGGGAATGT                      |
| MSS2-R                                                                                  | TTGATCAAGACGAGGAGTAGCT                      |

| Primer name                               | Primer sequence (5'→3')                        |
|-------------------------------------------|------------------------------------------------|
| MSS4-L                                    | AGTATTTTCGTTACCTTGGC                           |
| MSS4-R                                    | GCTTGGTGGAAAAGATCGTA                           |
| MSS13-L                                   | TAGCGCTATCTTTCGGCCCT                           |
| MSS13-R                                   | ACCCGAAGGTCCTGGTCTCT                           |
| MSS14-L                                   | GCTCGTTCGATTAAGCTCAA                           |
| MSS14-R                                   | GAATTCCTCTTTCATTGCGG                           |
| <b>The primer used in nap-CMS qRT-PCR</b> |                                                |
| nad5                                      | GACGATCGATTATCTACCCA<br>CTATCATTATGCCTTTGCAA   |
| atp6                                      | ACCAAGGATTGCCAAGCATT<br>ATCCATCTTTGTTTCATGCTGC |
| Orf222                                    | ATGATGGTGACCACATCTGCT<br>GCAATCGTCCCTACCGTCGTA |
| Orf139                                    | ATGAAAGAATCATTTTATGCT<br>TATCGAAGTCCTCTCCTTCA  |
| Ap3                                       | TACCACCATCTGAAATGCGCG<br>CATTTGCTGAGATACTGGATG |

**Table S1. The primer used in all studies.**
