# Supplementary material for: Induction of Male Sterility by Targeted Mutation of a Restorer-of-Fertility Gene with CRISPR/Cas9-Mediated Genome Editing in Brassica napus L.
Source: MDPI journal article supplement (doi:10.3390/plants11243501), 2022-12-13
Supplement: s1 [file s1]

**Table S2. Genotypical study of *bnarf111* transgenic plants and next-generation transmission analysis.**

| Plant ID #            | Progeny        | +ve | <i>BnaRFL11</i>   |                    |
|-----------------------|----------------|-----|-------------------|--------------------|
|                       |                |     | S1                | S2                 |
| <i>bnarf111-1</i>     | T <sub>0</sub> | Yes | Homo (+2bp)       | Homo (+1bp, -1bp)  |
| <i>bnarf111-1-5</i>   | T <sub>1</sub> | Yes | Homo (+2bp)       | Homo (+1bp, -1bp)  |
| <i>bnarf111-5</i>     | T <sub>0</sub> | Yes | Homo (-31bp)      | Homo (-5bp, +11bp) |
| <i>bnarf111-5-8</i>   | T <sub>1</sub> | Yes | Homo (-31bp)      | Homo (-5bp, +11bp) |
| <i>bnarf111-8</i>     | T <sub>0</sub> | Yes | Homo (-3bp)       | Hetero             |
| <i>bnarf111-8-3</i>   | T <sub>1</sub> | Yes | Homo (-3bp)       | Hetero             |
| <i>bnarf111-15</i>    | T <sub>0</sub> | Yes | Hetero            | Homo (-9bp)        |
| <i>bnarf111-15-3</i>  | T <sub>1</sub> | Yes | Hetero            | Homo (-9bp)        |
| <i>bnarf111-19</i>    | T <sub>0</sub> | Yes | Homo (-143bp)     | Homo (-11bp)       |
| <i>bnarf111-19-8</i>  | T <sub>1</sub> | Yes | Homo (-143bp)     | Homo (-11bp)       |
| <i>bnarf111-23</i>    | T <sub>0</sub> | Yes | Homo (+2bp)       | Homo (-18bp)       |
| <i>bnarf111-23-4</i>  | T <sub>1</sub> | Yes | Homo (+2bp)       | Homo (-18bp)       |
| <i>bnarf111-27</i>    | T <sub>0</sub> | Yes | Homo (+2bp)       | Homo (-2bp)        |
| <i>bnarf111-27-4</i>  | T <sub>1</sub> | Yes | Homo (+2bp)       | Homo (-2bp)        |
| <i>bnarf111-34</i>    | T <sub>0</sub> | Yes | Homo (-2bp)       | Hetero             |
| <i>bnarf111-34-8</i>  | T <sub>1</sub> | Yes | Homo (-2bp)       | Hetero             |
| <i>bnarf111-38</i>    | T <sub>0</sub> | Yes | Homo (-4bp)       | Homo (+1bp, -2bp)  |
| <i>bnarf111-38-10</i> | T <sub>1</sub> | Yes | Homo (-4bp)       | Homo (+1bp, -2bp)  |
| <i>bnarf111-44</i>    | T <sub>0</sub> | Yes | Homo (+2bp)       | Homo (+2bp)        |
| <i>bnarf111-44-7</i>  | T <sub>1</sub> | Yes | Homo (+2bp)       | Homo (+2bp)        |
| <i>bnarf111-57</i>    | T <sub>0</sub> | Yes | Homo (+3bp)       | Homo (+2bp, -4bp)  |
| <i>bnarf111-57-3</i>  | T <sub>1</sub> | Yes | Homo (+3bp)       | Homo (+2bp, -4bp)  |
| <i>bnarf111-69</i>    | T <sub>0</sub> | Yes | Homo (+6bp, -2bp) | Homo (-5bp)        |
| <i>bnarf111-69-5</i>  | T <sub>1</sub> | Yes | Homo (+6bp, -2bp) | Homo (-5bp)        |
| <i>bnarf111-73</i>    | T <sub>0</sub> | Yes | Hetero            | Homo (-8bp)        |
| <i>bnarf111-73-5</i>  | T <sub>1</sub> | Yes | Hetero            | Homo (-8bp)        |
| <i>bnarf111-75</i>    | T <sub>0</sub> | Yes | Homo (-6bp, +3bp) | Homo (+1bp, -2bp)  |
| <i>bnarf111-75-6</i>  | T <sub>1</sub> | Yes | Homo (-6bp, +3bp) | Homo (+1bp, -2bp)  |
| <i>bnarf111-79</i>    | T <sub>0</sub> | Yes | Homo (-8bp, +5bp) | Hetero             |
| <i>bnarf111-79-7</i>  | T <sub>1</sub> | Yes | Homo (-8bp, +5bp) | Hetero             |
| <i>bnarf111-83</i>    | T <sub>0</sub> | Yes | Hetero            | Homo (+4bp, -1bp)  |
| <i>bnarf111-83-4</i>  | T <sub>1</sub> | Yes | Hetero            | Homo (+4bp, -1bp)  |
| <i>bnarf111-87</i>    | T <sub>0</sub> | Yes | Homo (+2bp)       | Homo (-4bp)        |
| <i>bnarf111-87-7</i>  | T <sub>1</sub> | Yes | Homo (+2bp)       | Homo (-4bp)        |

Hetero means heterozygous, Homo means homozygous, and WT means wild form. "-/+" demonstrates the synchronized removal and addition, in each copy of the mutated representative target, of the indicated number of nucleotides; All other targets are wild type except indicated targets.
