# Supplementary material for: Induction of Male Sterility by Targeted Mutation of a Restorer-of-Fertility Gene with CRISPR/Cas9-Mediated Genome Editing in Brassica napus L.
Source: MDPI journal article supplement (doi:10.3390/plants11243501), 2022-12-13
Supplement: s1 [file s1]

**Table S3. Molecular investigation of CRISPR/Cas9-tempted transmutations in *bnarfl11* and it has spread to from T<sub>0</sub> to T<sub>1</sub> generations.**

| Examination of T <sub>0</sub> lines |                      |                       | Mandilion Segregation of mutation to T <sub>1</sub> lines |        |        |         |                                |
|-------------------------------------|----------------------|-----------------------|-----------------------------------------------------------|--------|--------|---------|--------------------------------|
| Plant identification                | Genetic constitution | Mutation <sup>a</sup> | plants examined                                           | WT     | Hetero | Homo    | transmission rate <sup>b</sup> |
| <i>bnarfl11-1</i>                   | AA09                 | +2, +1, -1            | 14                                                        | AA (0) | Aa (0) | aa (14) | 100%                           |
| <i>bnarfl11-5</i>                   | AA09                 | +1, -31, -1, +1       | 14                                                        | AA (0) | Aa (0) | aa (14) | 100%                           |
| <i>bnarfl11-8</i>                   | AA09                 | -3                    | 14                                                        | AA (0) | Aa (7) | aa (7)  | 50%                            |
| <i>bnarfl11-15</i>                  | AA09                 | -9, +1                | 14                                                        | AA (0) | Aa (5) | aa (0)  | 35%                            |
| <i>bnarfl11-19</i>                  | AA09                 | -143, -11             | 14                                                        | AA (0) | Aa (0) | aa (14) | 100%                           |
| <i>bnarfl11-23</i>                  | AA09                 | +2, -18               | 14                                                        | AA (0) | Aa (0) | aa (14) | 100%                           |
| <i>bnarfl11-27</i>                  | AA09                 | +2, -2                | 14                                                        | AA (0) | Aa (0) | aa (14) | 100%                           |
| <i>bnarfl11-34</i>                  | AA09                 | -22, +1               | 14                                                        | AA (0) | Aa (7) | aa (7)  | 50%                            |
| <i>bnarfl11-38</i>                  | AA09                 | -4, +1, -2            | 14                                                        | AA (0) | Aa (0) | aa (14) | 100%                           |
| <i>bnarfl11-44</i>                  | AA09                 | +2, -7, +2            | 14                                                        | AA (0) | Aa (0) | aa (14) | 100%                           |
| <i>bnarfl11-57</i>                  | AA09                 | +1, -1                | 14                                                        | AA (0) | Aa (0) | aa (14) | 100%                           |
| <i>bnarfl11-69</i>                  | AA09                 | +1, -2, -5            | 14                                                        | AA (0) | Aa (0) | aa (14) | 100%                           |
| <i>bnarfl11-73</i>                  | AA09                 | 0                     | 14                                                        | AA (7) | Aa (7) | aa (0)  | 50%                            |
| <i>bnarfl11-75</i>                  | AA09                 | -6, +3, +1, -2        | 14                                                        | AA (0) | Aa (0) | aa (14) | 100%                           |
| <i>bnarfl11-79</i>                  | AA09                 | -8, +5                | 14                                                        | AA (0) | Aa (7) | aa (7)  | 50%                            |
| <i>bnarfl11-83</i>                  | AA09                 | +4, -1, -2            | 14                                                        | AA (0) | Aa (7) | aa (7)  | 50%                            |
| <i>bnarfl11-87</i>                  | AA09                 | +2, -11, -4, +2       | 14                                                        | AA (0) | Aa (0) | aa (14) | 100%                           |

\* WT stands for wild type; Hetero stands for heterozygous; Homo stands for homozygous, a "-" and "+" denotes the loss and addition of the specified number bases simultaneously. B was determined based on the number of lines with mutation by the entire line verified for mutation.
