# Supplementary material for: Induction of Male Sterility by Targeted Mutation of a Restorer-of-Fertility Gene with CRISPR/Cas9-Mediated Genome Editing in Brassica napus L.
Source: MDPI journal article supplement (doi:10.3390/plants11243501), 2022-12-13
Supplement: s1 [file s1]

Table S4. Exposure of off-effects for designed guiding-RNA in mutant lines.

| Table S1. Exposure of on-target effects for designed guiding RNA in mutant lines. |                                                         |                          |                          |                        |                           |  |
|-----------------------------------------------------------------------------------|---------------------------------------------------------|--------------------------|--------------------------|------------------------|---------------------------|--|
| Sequence ID                                                                       | Sequence                                                | No. of mismatching bases | assumed off-target locus | Plant number sequenced | Off-target deletion (Y/N) |  |
| On target<br><i>BnaRFL11</i>                                                      | S1<br>CAAGACTCAGAGGGATACGAGG                            |                          |                          |                        |                           |  |
| Off-target site<br><i>BnaRFL11</i>                                                | OFF-1<br>GAAGA <b>ATT</b> AGAGGGATACG                   | 3                        | <i>BnaA05g25250D</i>     | 50                     | No                        |  |
|                                                                                   | OFF-2<br>GAAGAC <b>AA</b> AGAGGGATACG                   | 3                        | <i>BnaC06g22890D</i>     | 50                     | No                        |  |
|                                                                                   | OFF-2<br>GAAGAC <b>AA</b> AGAGGGATACG                   | 3                        | <i>BnaA01g20240D</i>     | 50                     | No                        |  |
|                                                                                   | OFF-4<br>C <b>TT</b> GA <b>AT</b> CA <b>T</b> AGGGATACG | 4                        | <i>BnaC03g01350D</i>     | 50                     | No                        |  |
| On target<br><i>BnaRFL11</i>                                                      | S2<br>GTATCCCTCTGAGTCTTGGAGG                            |                          |                          | 50                     | No                        |  |
| Off-target site<br><i>BnaRFL11</i>                                                | OFF-1<br>TTAT <b>T</b> C <b>G</b> TCTGAGTCTTGG          | 3                        | <i>BnaC09g23000D</i>     | 50                     | No                        |  |
|                                                                                   | OFF-2<br>G <b>AG</b> TC <b>AC</b> GCTGAGTCTTGG          | 4                        | <i>BnaCnng39820D</i>     | 50                     | No                        |  |
|                                                                                   | OFF-3<br>G <b>AG</b> TC <b>AC</b> GCTGAGTCTTGG          | 4                        | <i>BnaC09g14400D</i>     | 50                     | No                        |  |
