# Supplementary material for: Induction of Male Sterility by Targeted Mutation of a Restorer-of-Fertility Gene with CRISPR/Cas9-Mediated Genome Editing in Brassica napus L.
Source: MDPI journal article supplement (doi:10.3390/plants11243501), 2022-12-13
Supplement: s1 [file s1]

**Table S5. Comparison of editing efficiency for *BnaRFL11*-promoters with other published gene-editing studies.**

| Promoter of sgRNA | Target sequence                 | Target genes <sup>b</sup> | GC % content (Without PAM) | Positive lines of T <sub>0</sub> | Editing lines | Editing efficiency <sup>c</sup> |
|-------------------|---------------------------------|---------------------------|----------------------------|----------------------------------|---------------|---------------------------------|
| U6-26             | CAAGACTCAGAGGGATACG <b>AGG</b>  | <i>BnaRFL11</i>           | 57%                        | 108                              | 70            | 64.81%                          |
|                   | GAGGTCGTCCGAGATGGCCG <b>AGG</b> | <i>BnaA9-RGA</i>          | 70%                        | 29                               | 28            | 96.60%                          |
|                   | CAAGGTGAGGTCGTCAGAGA <b>TGG</b> | <i>BnaC9-RGA</i>          | 55%                        | 29                               | 25            | 86.20%                          |
|                   | CAAGGTTAGGTCTTCGGAGA <b>TGG</b> | <i>BnaA6-RGA</i>          | 50%                        | 29                               | 28            | 96.60%                          |
|                   | CAGGTCGTCGGAGATGGCTG <b>AGG</b> | <i>BnaC7-RGA</i>          | 65%                        | 29                               | 27            | 93.10%                          |
|                   | GCACAAGACGACGGCATTGC <b>TGG</b> | <i>BnaA2-DA2</i>          | 60%                        | 17                               | 7             | 41.20%                          |
|                   | GAACACCTTAGGATTTGTGC <b>TGG</b> | <i>BnaC5-RGA</i>          | 50%                        | 17                               | 6             | 35.30%                          |
| U6-29             | GTATCCCTCTGAGTCTTGG <b>AGG</b>  | <i>BnaRFL11</i>           | 50%                        | 108                              | 50            | 46.29%                          |
|                   | ACCCGTCGGAGCTCTACTCG <b>TGG</b> | <i>BnaA9-RGA</i>          | 65%                        | 29                               | 8             | 27.6%                           |
|                   | ACCCGTCGGAGCTTTACTCG <b>TGG</b> | <i>BnaC9-RGA</i>          | 60%                        | 29                               | 9             | 31.00%                          |
|                   | ACCCCGCTGAGCTTTACTCG <b>TGG</b> | <i>BnaA6-RGA</i>          | 60%                        | 29                               | 10            | 34.50%                          |
|                   | ACCCTGCTGAGCTCTACTCT <b>TGG</b> | <i>BnaC7-RGA</i>          | 55%                        | 29                               | 12            | 41.40%                          |
|                   | GGGAGCTAAGTACGTAGACT <b>TGG</b> | <i>BnaA2-DA2</i>          | 50%                        | 17                               | 8             | 47.12%                          |
|                   | GAACACCTTAGGATTTGTGC <b>TGG</b> | <i>BnaC5-RGA</i>          | 45%                        | 17                               | 14            | 82.40%                          |

<sup>a</sup>The PAM is in red.. <sup>b</sup>The target genes *BnaRFL11* (Current study), *BnaA9*, *BnaC9*, *BnaA6*, *BnaC7*, *BnaA2*, *BnaC5* (Yang et al 2018). <sup>c</sup> for each target, the %age of modified plantations compared to the number of tested plants.
