# Supplementary material for: Induction of Male Sterility by Targeted Mutation of a Restorer-of-Fertility Gene with CRISPR/Cas9-Mediated Genome Editing in Brassica napus L.
Source: MDPI journal article supplement (doi:10.3390/plants11243501), 2022-12-13
Supplement: s1 [file s1]

|                   | 10         | 20         | 30         | 40         | 50         | 60         | 70         | 80         | 90         | 100        |
|-------------------|------------|------------|------------|------------|------------|------------|------------|------------|------------|------------|
| BnaA09g45590D     | .... ....  | .... ....  | .... ....  | .... ....  | .... ....  | .... ....  | .... ....  | .... ....  | .... ....  | .... ....  |
| At1g12620         | TGAAATTCGT | TCGGTGTGCG | GATCTAGTTG | TGGGTGAAAG | GGCGAA---G | AAGAATC--- | ---ATCAAGT | CA--CTGAAG | ATGAAGATGG | GAGTGGAGTT |
| At1g12300         | TTTGTTTTAT | TGTGTGTGAA | AGAGGTGTAA | TGAGCAGACA | TTGGTGTCTG | TGGAAGCCGA | ACAAACGAAT | CAGCACAAAA | CCGAAGACGT | GACTCCAATT |
| Clustal Consensus | ** *       | ** **      |            | * *        | *          | *          | *          | * * * *    | ** *       | * * *      |

  

|                   | 110        | 120        | 130        | 140        | 150        | 160        | 170        | 180        | 190        | 200        |
|-------------------|------------|------------|------------|------------|------------|------------|------------|------------|------------|------------|
| BnaA09g45590D     | .... ....  | .... ....  | .... ....  | .... ....  | .... ....  | .... ....  | .... ....  | .... ....  | .... ....  | .... ....  |
| At1g12620         | GTTCTTCTTC | TTCTTTCTAG | TTCTTTATTT | TTCCAGATTT | GAAACAAAAA | CAGACAATGT | TGTGTCGGAG | ATTGGTACGT | GAGCCTCGTA | TCCCTCTGAG |
| At1g12300         | TTTTTTTTTT | TAAATCAGAG | CTTTCAAATT | CTTAAC--TT | GAGTCATGCG | GGGATTG-AT | TCAGACACGT | CTTCTCGAGA | CAGGTACTCT | AAGAAGTGCT |
| Clustal Consensus | * *        | **         | * **       | * *        | *          | **         | *          | *          | *          | **         |

  

|                   | 210        | 220        | 230         | 240        | 250        | 260        | 270        | 280        | 290        | 300        |
|-------------------|------------|------------|-------------|------------|------------|------------|------------|------------|------------|------------|
| BnaA09g45590D     | .... ....  | .... ....  | .... ....   | .... ....  | .... ....  | .... ....  | .... ....  | .... ....  | .... ....  | .... ....  |
| At1g12620         | TCTTGGAGGT | ACTCTTACAG | TTACAACCTCA | TCATTTGCTC | TCTCGGAAGA | TGTC-----T | TGTTACAAAG | AGAGATTGCG | AAGTGGGATC | GTCGATATTA |
| At1g12300         | TTATCTTTGT | CTTGCTATGG | ACGAGTCTTT  | TCTAGTGTCA | GTGATGGGAA | AGGGAAAGTC | TCCTATAGAG | AGAGATTGAG | AAGTGGGATT | GTGATATCA  |
| Clustal Consensus | *          | * *        | **          | ** *       | *          |            | * * * *    | ***** *    | ***** *    | * * * * *  |

  

|                   | 310        | 320        | 330        | 340        | 350        | 360        | 370        | 380        | 390       | 400        |
|-------------------|------------|------------|------------|------------|------------|------------|------------|------------|-----------|------------|
| BnaA09g45590D     | .... ....  | .... ....  | .... ....  | .... ....  | .... ....  | .... ....  | .... ....  | .... ....  | .... .... | .... ....  |
| At1g12620         | AGAAAGATGA | AGCTGTTGCT | CTGTTTCAA  | CTATGATTGT | GTCTCGTCCT | CTTCCT---  | -----      | -----      | -----     | -----      |
| At1g12300         | AGGAAGATGA | TGCTGTTGAT | CTGTTTCAAG | AAATGACTAG | GTCTCGTCCT | CGTCCTCGTC | TTATTGATTT | CAGTAGATTG | TTTAGTGTG | TTGCCAGAAC |
| Clustal Consensus | ** *****   | *** ** *   | ***** *    | ***** *    | ***** *    | ***** *    | ***** *    | ***** *    | ***** *   | ***** *    |

  

|                   | 410        | 420        | 430        | 440        | 450        | 460        | 470        | 480        | 490        | 500        |
|-------------------|------------|------------|------------|------------|------------|------------|------------|------------|------------|------------|
| BnaA09g45590D     | .... ....  | .... ....  | .... ....  | .... ....  | .... ....  | .... ....  | .... ....  | .... ....  | .... ....  | .... ....  |
| At1g12620         | -----      | -----      | -----      | -ACGCAAATG | GAAATGAATG | GGATTGCGCA | TGACCTCTAC | ACGCTGAGTA | TTGTCATCAA | CTGCTTCTGC |
| At1g12300         | AAAGCAATAT | GATCTAGTGT | TAGATCTCTG | CAAGCAAATG | GAATTAAAGG | GAATTGCGCA | TAACCTCTAC | ACTCTGAGTA | TTATGATTAA | TTGCTGTTGT |
| Clustal Consensus |            |            |            | * *****    | *** * * *  | * * * * *  | * * * * *  | * * * * *  | * * * * *  | *** **     |

  

|                   | 510        | 520        | 530        | 540        | 550       | 560        | 570        | 580        | 590        | 600        |
|-------------------|------------|------------|------------|------------|-----------|------------|------------|------------|------------|------------|
| BnaA09g45590D     | .... ....  | .... ....  | .... ....  | .... ....  | .... .... | .... ....  | .... ....  | .... ....  | .... ....  | .... ....  |
| At1g12620         | CGTCGCCGGA | AATC-----  | -----      | -----      | -----     | -----      | -----      | --GTCACCTT | CTCAACTTTG | ATTAACGGTT |
| At1g12300         | CGATGTCGTA | AATCTCTTTT | GGCTTTTTCT | GCTATGGGGA | AGATCATTA | ACTTGGGTAT | GAGCCTGATA | CAGTCACATT | TTCAACTTTG | ATAAACGGAT |
| Clustal Consensus | ** * * *   | *****      |            |            |           |            |            | ***** *    | ***** *    | ***** *    |

|                   |            |            |            |            |            |            |            |            |            |            |
|-------------------|------------|------------|------------|------------|------------|------------|------------|------------|------------|------------|
|                   | 610        | 620        | 630        | 640        | 650        | 660        | 670        | 680        | 690        | 700        |
| BnaA09g45590D     | .... ....  | .... ....  | .... ....  | .... ....  | .... ....  | .... ....  | .... ....  | .... ....  | .... ....  | .... ....  |
| At1g12620         | TATGTCTCAA | GGGTCGAGTC | TCTGAAGCTG | TGGAGTTAGT | TGATCGTATG | GTGGAAATGA | AGGTTATTCC | AAATCTCATC | ATACTTAACA | CTCTTGTCAA |
| At1g12300         | TATGTCTCGA | GGGTAGAGTT | TCCGAAGCTC | TGGAATTAGT | TGATCGAATG | GTTGAAATGG | GACATAAACC | CACTCTCATA | ACGCTTAACG | CTCTGGTCAA |
| Clustal Consensus | ***** *    | **** *     | ** *****   | **** ***** | ***** *    | ** *****   | ** *       | ***** *    | ***** *    | ***** *    |

  

|                   |            |            |            |            |            |            |            |            |            |            |
|-------------------|------------|------------|------------|------------|------------|------------|------------|------------|------------|------------|
|                   | 710        | 720        | 730        | 740        | 750        | 760        | 770        | 780        | 790        | 800        |
| BnaA09g45590D     | .... ....  | .... ....  | .... ....  | .... ....  | .... ....  | .... ....  | .... ....  | .... ....  | .... ....  | .... ....  |
| At1g12620         | TGGACTTTGT | CTCCAAGATA | GAGTGTCCGA | AGCAGTGGCT | TTGATAGATC | GAATGGTGGC | TAATGGATGT | CAACCCGATC | AGTTTACCTA | TGGTCCGATT |
| At1g12300         | TGGACTTTGT | CTCAACGGTA | AAGTCTCTGA | TGCTGTGCTT | TTGATTGATC | GAATGGTTGA | GAATGGCTTT | CAACCCAATG | AAGTAACTTA | TGGACCGGTT |
| Clustal Consensus | ***** *    | *** ** *   | ** ** *    | ** ** *    | ***** *    | ***** *    | *** ** *   | ***** *    | * ** *     | ** ** *    |

  

|                   |            |            |            |            |            |            |            |            |            |             |
|-------------------|------------|------------|------------|------------|------------|------------|------------|------------|------------|-------------|
|                   | 810        | 820        | 830        | 840        | 850        | 860        | 870        | 880        | 890        | 900         |
| BnaA09g45590D     | .... ....  | .... ....  | .... ....  | .... ....  | .... ....  | .... ....  | .... ....  | .... ....  | .... ....  | .... ....   |
| At1g12620         | TTGAACAGAA | TGTGCAA--- | -----      | -----      | -----      | -----ATG   | GAAGATCGAA | AGGTCAAGCC | -----TC    | AAAGTA----- |
| At1g12300         | TTAAAGTAA  | TGTGTAAGTC | CGGCCAAACT | GCCCTTGCCA | TGGAGTTGCT | CAGAAAGATG | GAAGAAAGAA | AGATCAAGCT | CGATGCAGTC | AAATACAGTA  |
| Clustal Consensus | ** ** *    | ** **** *  | CGGCCAAACT | GCCCTTGCCA | TGGAGTTGCT | CAGAAAGATG | GAAGAAAGAA | ATATCAAGCT | CGATGCAGTC | AAATACAGTA  |

  

|                   |            |            |            |            |            |            |            |            |            |            |
|-------------------|------------|------------|------------|------------|------------|------------|------------|------------|------------|------------|
|                   | 910        | 920        | 930        | 940        | 950        | 960        | 970        | 980        | 990        | 1000       |
| BnaA09g45590D     | .... ....  | .... ....  | .... ....  | .... ....  | .... ....  | .... ....  | .... ....  | .... ....  | .... ....  | .... ....  |
| At1g12620         | TCATCATTGA | TGGTCTGTGC | AAAGACGGGA | GCCTCGACAA | TGCATTCAAC | CTTTTCAATG | AAATGGAAAT | CAAAGGGTTC | AAAGCTGATA | TTATTATCTA |
| At1g12300         | TCATCATTGA | TGGTCTTTGC | AAACACGGGA | GCCTCGACAA | TGCATTCAAC | CTTTTCAATG | AAATGGAAAT | GAAAGGGATC | ACAACAAATA | TTATTACCTA |
| Clustal Consensus |            |            |            |            |            |            |            |            |            |            |

  

|                   |            |            |            |            |            |            |            |            |            |            |
|-------------------|------------|------------|------------|------------|------------|------------|------------|------------|------------|------------|
|                   | 1010       | 1020       | 1030       | 1040       | 1050       | 1060       | 1070       | 1080       | 1090       | 1100       |
| BnaA09g45590D     | .... ....  | .... ....  | .... ....  | .... ....  | .... ....  | .... ....  | .... ....  | .... ....  | .... ....  | .... ....  |
| At1g12620         | CACCACTCTC | ATTAGAGGCT | TTTGTTACGC | TGGTAGATGG | GATGATGGTG | CCAAGTTGCT | GAGGGATATG | ATCAAAAGGA | AAATCACACC | AGACGTGGTC |
| At1g12300         | CAACATTCTC | ATTGGCGGCT | TTTGTAATGC | TGGTAGATGG | GATGATGGTG | CCAAGTTATT | GAGGGATATG | ATCAAGAGGA | AAATCAACCC | CAACGTTGTC |
| Clustal Consensus |            |            |            |            |            |            |            |            |            |            |

  

|                   |            |            |            |            |            |            |            |            |            |            |
|-------------------|------------|------------|------------|------------|------------|------------|------------|------------|------------|------------|
|                   | 1110       | 1120       | 1130       | 1140       | 1150       | 1160       | 1170       | 1180       | 1190       | 1200       |
| BnaA09g45590D     | .... ....  | .... ....  | .... ....  | .... ....  | .... ....  | .... ....  | .... ....  | .... ....  | .... ....  | .... ....  |
| At1g12620         | -----TG    | CGTTGATTGA | TAGTTTTGTG | AAAGAAGGAA | AGCTTACTGA | GGCTAAAGAG | TTGTACAATG | AGATGATCGT | AAGAGGCTTA | GATCCTAATA |
| At1g12300         | GCTTTCAGCG | CGTTAATAGA | TTGTTTTGTG | AAAGAGGGAA | AGCTTCGAGA | GGCTGAAGAA | CTGCACAAGG | AGATGATACA | ACGAGGCATA | TCTCCTGATA |
| Clustal Consensus |            | * ** ** *  | * *****    | ***** *    | ***** *    | ***** *    | ** *****   | ***** *    | ***** *    | ***** *    |

|                   | 1210       | 1220       | 1230       | 1240       | 1250       | 1260       | 1270       | 1280       | 1290       | 1300       |
|-------------------|------------|------------|------------|------------|------------|------------|------------|------------|------------|------------|
| BnaA09g45590D     | .... ....  | .... ....  | .... ....  | .... ....  | .... ....  | .... ....  | .... ....  | .... ....  | .... ....  | .... ....  |
| At1g12620         | CCATTACATA | TGGTTCTCTG | ATACATGGGC | TGTGCATGGA | GAATCGCTTA | GATGAGGCCA | ACCAGATGTT | GGATCTGATG | GTTAGCAAGG | GATGCGATCC |
| At1g12300         | CTGTTACGTA | CACTTCTTTG | ATAGATGGGT | TTTGCAAGGA | GAACCAGCTA | GATAAGGCCA | ACCACATGCT | GGATCTGATG | GTTAGCAAAG | GATGCGGTCC |
| Clustal Consensus | * * * * *  | *****      | * * * * *  | * * * * *  | * * * * *  | * * * * *  | * * * * *  | * * * * *  | * * * * *  | * * * * *  |

|                   | 1310       | 1320       | 1330       | 1340       | 1350       | 1360       | 1370       | 1380       | 1390       | 1400       |
|-------------------|------------|------------|------------|------------|------------|------------|------------|------------|------------|------------|
| BnaA09g45590D     | .... ....  | .... ....  | .... ....  | .... ....  | .... ....  | .... ....  | .... ....  | .... ....  | .... ....  | .... ....  |
| At1g12620         | TGATATTTGG | ACGTATAATA | TCCTTATAAA | CGGGTATTGT | AAGGCTAAAC | TGGTTGATGA | AGGTATGAGA | CTTTTCCGCA | AAATGTCTCT | GAGAGGAGTG |
| At1g12300         | TAATATCAGG | ACGTTTAATA | TCCTCATAAA | TGGATATTGT | AAGGCTAATC | TGATTGACGA | TGGTTTGAA  | CTCTTCCGCA | AAATGTCTTT | GAGAGGAGTG |
| Clustal Consensus | * * * * *  | * * * * *  | * * * * *  | * * * * *  | * * * * *  | * * * * *  | * * * * *  | * * * * *  | * * * * *  | * * * * *  |

|                   | 1410       | 1420       | 1430       | 1440       | 1450       | 1460       | 1470       | 1480       | 1490       | 1500       |
|-------------------|------------|------------|------------|------------|------------|------------|------------|------------|------------|------------|
| BnaA09g45590D     | .... ....  | .... ....  | .... ....  | .... ....  | .... ....  | .... ....  | .... ....  | .... ....  | .... ....  | .... ....  |
| At1g12620         | GTTGCAGATA | CAGTCACTTA | TAGCAGTCTC | ATTCAAGGGT | TTTGTCAATC | AGGAAAACCT | AAAGTCGCCA | AAGAACTCTT | CCAAGAGATG | GTCTCTCAAG |
| At1g12300         | GTTGCAGATA | CGGTTACTTA | TAACACTCTT | ATCCAAGGAT | TTTGTGAATT | GGGAAAACCT | GAAGTTGCCA | AAGAACTCTT | CCAAGAGATG | GTTTCTCGTC |
| Clustal Consensus | *****      | * * * * *  | * * * * *  | * * * * *  | * * * * *  | *****      | * * * * *  | *****      | *****      | * * * * *  |

|                   | 1510       | 1520       | 1530       | 1540       | 1550       | 1560       | 1570       | 1580       | 1590       | 1600       |
|-------------------|------------|------------|------------|------------|------------|------------|------------|------------|------------|------------|
| BnaA09g45590D     | .... ....  | .... ....  | .... ....  | .... ....  | .... ....  | .... ....  | .... ....  | .... ....  | .... ....  | .... ....  |
| At1g12620         | GTGTTCATCC | TAATATTGTA | ACCTACAAAA | TTTTGATGGA | TGGA-----  | -----      | -----      | -----      | -----      | -----      |
| At1g12300         | GTGTTCATCC | TAATATTGTA | ACCTACAAAA | TTTTGCTCGA | TGGGTTGTGT | GACAATGGGG | AACCAGAAAA | AGCGCTGGAA | ATATTTGAAA | AAATAGAGAA |
| Clustal Consensus | **** *     | * * * * *  | *****      | *****      | * * *      | *****      | *****      | *****      | *****      | *****      |

|                   | 1610       | 1620       | 1630       | 1640       | 1650       | 1660       | 1670       | 1680       | 1690       | 1700       |
|-------------------|------------|------------|------------|------------|------------|------------|------------|------------|------------|------------|
| BnaA09g45590D     | .... ....  | .... ....  | .... ....  | .... ....  | .... ....  | .... ....  | .... ....  | .... ....  | .... ....  | .... ....  |
| At1g12620         | -----      | -----      | -----      | -----      | -----      | -----      | -----GTC   | GATGAAGCTT | GGGATCTATT | TTGTAGCCTC |
| At1g12300         | GAGTAAGATG | GAGCTTGATA | TTGGTATCTA | TAACATCATC | ATTCATGGGA | TGTGCAATGC | TAGTAAGGTG | GATGATGCTT | GGGATTTATT | CTGTAGCCTC |
| Clustal Consensus | GAGTAAGATG | GAGCTTGATA | TTGGTATCTA | TAACATCATC | ATTCACGGGA | TGTGCAATGC | TAGTAAGGTG | GATGATGCTT | GGGATTTATT | CTGTAGCCTC |

|                   | 1710       | 1720       | 1730       | 1740       | 1750       | 1760       | 1770       | 1780       | 1790        | 1800       |
|-------------------|------------|------------|------------|------------|------------|------------|------------|------------|-------------|------------|
| BnaA09g45590D     | .... ....  | .... ....  | .... ....  | .... ....  | .... ....  | .... ....  | .... ....  | .... ....  | .... ....   | .... ....  |
| At1g12620         | CCTCTCAAAG | AAGTGAAGCC | TGATGTCAAA | ACATACACCA | TAATGATTGG | AGGACTATGT | AAGAAAGGCT | CGATGTCTAA | AGCGGGCCTG  | TTATTTAAGA |
| At1g12300         | CCTCTCAAAG | GAGTGAAGCC | CGATGTCAAA | ACATACAATA | TAATGATTGG | GGGACTGTGT | AAGAAAGGCT | CACTGTCTGA | AGCAGACCTG  | TTGTTTAGAA |
| Clustal Consensus | CCCTCAAAG  | GAGTGAAGCC | CGGTGTCAAA | ACATACAATA | TAATGATTGG | GGGACTGTGT | AAGAAAGGCC | CATTGTCTGA | AGCGGAACCTG | TTGTTTAGAA |

|                   |            |            |            |            |            |            |            |            |            |            |
|-------------------|------------|------------|------------|------------|------------|------------|------------|------------|------------|------------|
|                   | 1810       | 1820       | 1830       | 1840       | 1850       | 1860       | 1870       | 1880       | 1890       | 1900       |
| BnaA09g45590D     | .... ....  | .... ....  | .... ....  | .... ....  | .... ....  | .... ....  | .... ....  | .... ....  | .... ....  | .... ....  |
| At1g12620         | AAATGGGAGA | GGATGGGATT | GCACCAGATG | ATTGTACATG | GAACACACTA | ATCCGAGCTC | ATCTCCGAGG | TGGTGACTTA | GCAACATCAG | CTAAACTTAT |
| At1g12300         | AAATGGAAGA | GGATGGGCAT | TCGCCAAATG | GTTGTACATA | CAACATACTC | ATCAGGGCAC | ATCTTGGAGA | AGGTGATGCA | ACCAAATCAG | CTAAACTTAT |
| Clustal Consensus | *****      | ***        | *****      | *          | *          | ***        | ***        | ***        | *****      | *****      |
|                   | 1910       | 1920       | 1930       | 1940       | 1950       | 1960       | 1970       | 1980       | 1990       | 2000       |
| BnaA09g45590D     | .... ....  | .... ....  | .... ....  | .... ....  | .... ....  | .... ....  | .... ....  | .... ....  | .... ....  | .... ....  |
| At1g12620         | AGAAGAAATG | AAGAGTTGTG | GGTTCTCTGC | AGATGCTTCC | ACGATAAAGA | TGTTTATGGA | TATGTTATCG | GATGGTAGAA | TGAAGAAAAG | CTTTCTGGAT |
| At1g12300         | TGAAGAAATA | AAGAGGTGCG | GGTTCTCAGT | TGATGCTTCC | ACGGTAAAGA | TGGTTGTCGA | TATGTTATCG | GATGGTAGAT | TGAAGAAAAG | CTTTTGGAT  |
| Clustal Consensus | *****      | *          | *****      | *          | *****      | *          | ***        | *          | *****      | *****      |
|                   | 2010       | 2020       | 2030       | 2040       | 2050       | 2060       | 2070       | 2080       | 2090       | 2100       |
| BnaA09g45590D     | .... ....  | .... ....  | .... ....  | .... ....  | .... ....  | .... ....  | .... ....  | .... ....  | .... ....  | .... ....  |
| At1g12620         | TTGCTTTCTT | AG-----    | -----      | -----      | -----      | -----      | -----      | -----      | -----      | -----      |
| At1g12300         | ATGCTTTCTT | AGAATTTTGG | TGTTTACATC | ATATTACCGT | CTCAGAGCAT | TGAAAGACTA | AGTTGGAGTT | TCATATGTGA | CAACATTGAT | GTACACAACA |
| Clustal Consensus | *****      | ***        | *****      | *****      | *****      | *****      | *****      | *****      | *****      | *****      |
|                   | 2110       | 2120       | 2130       | 2140       | 2150       | 2160       | 2170       | 2180       | 2190       | 2200       |
| BnaA09g45590D     | .... ....  | .... ....  | .... ....  | .... ....  | .... ....  | .... ....  | .... ....  | .... ....  | .... ....  | .... ....  |
| At1g12620         | TTTTTCTTAA | GCAGATCGAC | CACCAAGATT | TATAACCATT | CTCCGGGC-A | TGAAAGCAAG | CTCATAATTT | CCTTATCACT | CTGTTC--AT | CTGTCTACAT |
| At1g12300         | AACCTGAAAA | ACCTTCAGAC | TCTTGGAAC  | GGAAGTGTCT | CTTAAGGTTG | CGTTGTTTAG | CAGAAAAC   | TGTCAGGTGT | AAGATTGGAG | ATGGAAAGAC |
| Clustal Consensus | *****      | *****      | *****      | *****      | *****      | *****      | *****      | *****      | *****      | *****      |
|                   | 2210       | 2220       | 2230       | 2240       | 2250       | 2260       | 2270       | 2280       | 2290       | 2300       |
| BnaA09g45590D     | .... ....  | .... ....  | .... ....  | .... ....  | .... ....  | .... ....  | .... ....  | .... ....  | .... ....  | .... ....  |
| At1g12620         | TGCT--TTTC | AGATTGTACT | TGCTAAATTC | TG-----    | CACAAATATG | TATAG-GTAA | ATGATATAAT | TTGTAGCTTA | AACACACCAT | CGCTATCAAA |
| At1g12300         | TGCTAGTTTC | TGGTT-TGAT | AACTGGACTC | CTTTTGGTCC | CCTAATCAAG | TTCATTGGAA | CAGATGGCCC | CTGTAGTTGA | GAGCCCCTTT | GAATGCTAAG |
| Clustal Consensus | *****      | *****      | *****      | *****      | *****      | *****      | *****      | *****      | *****      | *****      |

**Figure S1. Sequence alignment of *BnaRFL11* with *Arabidopsis* homologs genes.** Gene sequence alignment from *B. napus* (*BnaA09g45590D*) and *A. thaliana* (*AT1G12300*, *AT1G12620*). The base differences are highlighted in grey boxes. Star show the similarities between each copy and portion without star show polymorphism.

10                      20                      30                      40                      50                      60                      70                      80                      90                      100

|                          |            |             |            |            |            |            |            |            |            |            |           |
|--------------------------|------------|-------------|------------|------------|------------|------------|------------|------------|------------|------------|-----------|
|                          | .... ....  | .... ....   | .... ....  | .... ....  | .... ....  | .... ....  | .... ....  | .... ....  | .... ....  | .... ....  | .... .... |
| <b>BnaA09g45590D</b>     | YKERLRSGIV | DIKKDEAVAL  | FQTMIVSRPL | PTQMEMNGIA | HDLYTLSIVI | NCFCRRRKL- | -----      | -----VT    | FSTLINGLCL | KGRVSEAVEL |           |
| <b>AT1G12300</b>         | YRERLRSGLV | DIKADDAIDL  | FRDMIHSRPL | PKQMELKGIA | HNLYTLSIMI | NCFCRCRKLC | LAFSAMGKII | KLGYEPNTIT | FSTLINGLCL | EGRVSEALEL |           |
| <b>AT1G12620</b>         | YRERLRSGIV | DIKEDDAVDL  | FQEMTRSRRP | PKQMELKGIA | HNLYTLSIMI | NCCRCRKLK  | LAFSAMGKII | KLGYEPDVT  | FSTLINGLCL | EGRVSEALEL |           |
| <b>Clustal Consensus</b> | *:*****:   | *** *: *: * | *: * ***   | *.***:***  | *:*****:   | ** ** **   |            | : *        | *****      | :*****:    | **        |

|                          |            |            |            |             |             |            |            |            |               |             |
|--------------------------|------------|------------|------------|-------------|-------------|------------|------------|------------|---------------|-------------|
|                          | 110        | 120        | 130        | 140         | 150         | 160        | 170        | 180        | 190           | 200         |
|                          | .... ....  | .... ....  | .... ....  | .... ....   | .... ....   | .... ....  | .... ....  | .... ....  | .... ....     | .... ....   |
| <b>BnaA09g45590D</b>     | VDRMVEMKVI | PNLIILNTLV | NGLCLQDRVS | EVALIDRMV   | ANGCQPDQFT  | YGPILNRMCK | WKIERSSLKY | ALIDSFVKEG | KLTEAKELYN    | EMIVRGDLPN  |
| <b>AT1G12300</b>         | VDRMVEMGHK | PDLITINTLV | NGLCLSGKEA | EAMLLIDKMV  | EYGCQPNVAVT | YGPVLNVNCK | RNIKLDAVKY | VLIDSFVKEG | KLREAELHK     | EMIHRIAPD   |
| <b>AT1G12620</b>         | VDRMVEMGHK | PTLITLNALV | NGLCLNGKVS | DAVLLIDRMV  | ETGFQPNVET  | YGPVLKVMCK | RKIKLDAVKY | ALIDCFVKEG | KLREAELHK     | EMIQRGISPD  |
| <b>Clustal Consensus</b> | *****      | * ** *: ** | *****.: :  | :*: ***: ** | * *: . *    | ***: *: ** | :*: .: **  | .***.***** | ** *: *: *: * | *** *: *: * |

|                          |              |             |             |             |            |              |            |             |               |            |
|--------------------------|--------------|-------------|-------------|-------------|------------|--------------|------------|-------------|---------------|------------|
|                          | 210          | 220         | 230         | 240         | 250        | 260          | 270        | 280         | 290           | 300        |
|                          | .... ....    | .... ....   | .... ....   | .... ....   | .... ....  | .... ....    | .... ....  | .... ....   | .... ....     | .... ....  |
| <b>BnaA09g45590D</b>     | TITYGSLIHG   | LCMENRLDEA  | NQMLDLMVSK  | GCDPDIWTYN  | ILINGYCKAK | LVDEGMRLFR   | KMSLRGVVAD | TVTYSSLIQG  | FCQSGKLKVA    | KELFQEMVSQ |
| <b>AT1G12300</b>         | TITYTSLIDG   | FCKENHLDKA  | NQMVDLMVSK  | GCDPNIRTFN  | ILINGYCKAN | RIDDGLELFR   | KMSLRGVVAD | TVTYNTLIQG  | FCELGKLNVA    | KELFQEMVSR |
| <b>AT1G12620</b>         | TVTYTSLIDG   | FCKENQLDKA  | NHMLDLMVSK  | GCGPNIRTFN  | ILINGYCKAN | LIDDGLELFR   | KMSLRGVVAD | TVTYNTLIQG  | FCELGKLEVA    | KELFQEMVSR |
| <b>Clustal Consensus</b> | *: ** ***. * | : * *: *: * | *: *: ***** | **.: * *: * | *****:     | : *: *: .*** | *****      | ****.: **** | ** *: *: *: * | *****:     |

|                          |            |            |            |             |            |             |              |             |            |            |
|--------------------------|------------|------------|------------|-------------|------------|-------------|--------------|-------------|------------|------------|
|                          | 310        | 320        | 330        | 340         | 350        | 360         | 370          | 380         | 390        | 400        |
|                          | .... ....  | .... ....  | .... ....  | .... ....   | .... ....  | .... ....   | .... ....    | .... ....   | .... ....  | .... ....  |
| <b>BnaA09g45590D</b>     | GVHPNIVTYK | ILMDG--VDE | AWDLFCSLPL | KEVKPDVKTY  | TIMIGGLCKK | GMSKAGLLF   | KKMGEDGIAP   | DDCTWNTLIR  | AHLRGGLAT  | SAKLIEEMKS |
| <b>AT1G12300</b>         | KVPPNIVTYK | ILLDGLKVDD | AWDLFCSLPL | KGVKPGVKTY  | NIMIGGLCKK | GPLSEAEELLF | RKMEEDGHAP   | DGWTYNILIR  | AHLGDGDATK | SVKLIEELKR |
| <b>AT1G12620</b>         | RVRPDIVSYK | ILLDGLKVDD | AWDLFCSLPL | KGVKPDVKTY  | NIMIGGLCKK | GSLSEADLLF  | RKMEEDGHSP   | NGCTYNILIR  | AHLGEGDATK | SAKLIEEIKR |
| <b>Clustal Consensus</b> | * *: *: *  | ** *: *    | *****      | * **.: **** | .*****     | *.: *: * ** | : ** *** : * | .. *: * *** | *** ** :   | *.*****:   |

|                          |            |            |              |
|--------------------------|------------|------------|--------------|
|                          | 410        | 420        | 430          |
|                          | .... ....  | .... ....  | .... ....    |
| <b>BnaA09g45590D</b>     | CGFSADASTI | KIVMDMLSDG | RMKKSFLDLL S |
| <b>AT1G12300</b>         | CGFSVDASTI | KMVIDMLSDG | RLKKSFLDML S |
| <b>AT1G12620</b>         | CGFSVDASTV | KMVVDMLSDG | RLKKSFLDML S |
| <b>Clustal Consensus</b> | ***.***:   | * *: ***** | *.*****: *   |

**Figure S2. Protein sequence alignment** from *B. napus* (*BnaA09g45590D*) and *A. thaliana* (*AT1G12300*, *AT1G12620*). The base differences are highlighted in grey boxes. Star show the similarities between each copy and portion without star show polymorphism.

***BnaRFL11* targets**

|                      |                    |            |             |             |            |            |            |                   |                   |                     |     |
|----------------------|--------------------|------------|-------------|-------------|------------|------------|------------|-------------------|-------------------|---------------------|-----|
|                      | 10                 | 20         | 30          | 40          | 50         | 60         | 70         | 80                | 90                | 100                 |     |
| <b>BnaA09g45590D</b> | AAATCATCGA         | TGAAATTCGT | TCGGTGTGCG  | GATCTAGTTG  | TGGGTGAAAG | GGCGAAGAAG | AATCATCAAG | TCACTGAAGA        | TGAAGATGGG        | AGTGGAGTTG          |     |
|                      | 110                | 120        | 130         | 140         | 150        | 160        | 170        | 180               | <u>S1</u>         | 190                 | 200 |
| <b>BnaA09g45590D</b> | TTCTTCTTCT         | TCTTCTAGGT | TCTTTATTTT  | TCCAGATTTG  | AAACAAAAAC | AGACAATGTT | GTGTCGGAGA | TTGGTACGTG        | <u>AGCCTCGTAT</u> | <u>CCCTCTGAGT</u>   |     |
|                      | 210                | 220        | 230         | 240         | 250        | 260        | 270        | 280               | 290               | 300                 |     |
| <b>BnaA09g45590D</b> | <u>CTTGG</u> AGGTA | CTCTTACAGT | TACAAC TCAT | CATT TGCTCT | CTCGGAAGAT | GTCTTGTTAC | AAAGAGAGAT | TGCGAAGTGG        | GATCGTCGAT        | ATTAAGAAAG          |     |
|                      | 310                | 320        | 330         | 340         | 350        | 360        | 370        | 380               | 390               | 400                 |     |
| <b>BnaA09g45590D</b> | ATGAAGCTGT         | TGCTCTGTTT | CAAAC TATGA | TTGTGTCTCG  | TCCTCTTCCT | ACGCAAATGG | AAATGAATGG | GATTGCGCAT        | GACCTCTACA        | CGCTGAGTAT          |     |
|                      | 410                | 420        | 430         | 440         | 450        | 460        | 470        | 480               | 490               | 500                 |     |
| <b>BnaA09g45590D</b> | TGTCATCAAC         | TGCTTCTGCC | GTGCGCCGAA  | ACTCGTCACT  | TTCTCAACTT | TGATTAACGG | TTTATGTCTC | AAGGGTCGAG        | TCTCTGAAGC        | TGTGGAGTTA          |     |
|                      | 510                | 520        | 530         | 540         | 550        | 560        | 570        | 580               | 590               | 600                 |     |
| <b>BnaA09g45590D</b> | GTTGATCGTA         | TGGTGGAAAT | GAAGGTTATT  | CCAAATCTCA  | TCATACTTAA | CACTCTTGTC | AATGGACTTT | GTCTCCAAGA        | TAGAGTGTCC        | GAAGCAGTGG          |     |
|                      | 610                | 620        | 630         | 640         | 650        | 660        | 670        | 680               | <u>S1</u>         | 690                 | 700 |
| <b>BnaA09g45590D</b> | CTTTGATAGA         | TCGAATGGTG | GCTAATGGAT  | GTCAACCCGA  | TCAGTTTACC | TATGGTCCGA | TTTTGAACAG | <u>AATGTGCAAA</u> | <u>TGGAAGATCG</u> | <u>AAAGG</u> TC AAG |     |
|                      | 710                | 720        | 730         | 740         | 750        | 760        | 770        | 780               | 790               | 800                 |     |
| <b>BnaA09g45590D</b> | CCTCAAGTAT         | GCGTTGATTG | ATAGTTTTGT  | GAAAGAAGGA  | AAGCTTACTG | AGGCTAAAGA | GTTGTACAAT | GAGATGATCG        | TAAGAGGCTT        | AGATCCTAAT          |     |
|                      | 810                | 820        | 830         | 840         | 850        | 860        | 870        | 880               | 890               | 900                 |     |
| <b>BnaA09g45590D</b> | ACCATTACAT         | ATGGTTCTCT | GATACATGGG  | CTGTGCATGG  | AGAATCGCTT | AGATGAGGCC | AACCAGATGT | TGGATCTGAT        | GGTTAGCAAG        | GGATGCGATC          |     |
|                      | 910                | 920        | 930         | 940         | 950        | 960        | 970        | 980               | 990               | 1000                |     |
| <b>BnaA09g45590D</b> | CTGATATTTG         | GACGTATAAT | ATCCTTATAA  | ACGGGTATTG  | TAAGGCTAAA | CTGGTTGATG | AAGGTATGAG | ACTTTTCCGC        | AAAATGTCTC        | TGAGAGGAGT          |     |

|                      |            |            |            |            |            |             |            |            |            |            |
|----------------------|------------|------------|------------|------------|------------|-------------|------------|------------|------------|------------|
|                      | 1010       | 1020       | 1030       | 1040       | 1050       | 1060        | 1070       | 1080       | 1090       | 1100       |
| <b>BnaA09g45590D</b> | .... ....  | .... ....  | .... ....  | .... ....  | .... ....  | .... ....   | .... ....  | .... ....  | .... ....  | .... ....  |
|                      | GGTTGCAGAT | ACAGTCACTT | ATAGCAGTCT | CATTCAAGGG | TTTGTCAAT  | CAGGAAACT   | TAAAGTCGCC | AAAGAACTCT | TCCAAGAGAT | GGTCTCTCAA |
|                      |            |            |            |            |            |             |            |            |            |            |
|                      | 1110       | 1120       | 1130       | 1140       | 1150       | 1160        | 1170       | 1180       | 1190       | 1200       |
| <b>BnaA09g45590D</b> | .... ....  | .... ....  | .... ....  | .... ....  | .... ....  | .... ....   | .... ....  | .... ....  | .... ....  | .... ....  |
|                      | GGTGTTCATC | CTAATATTGT | AACCTACAAA | ATTTTGATGG | ATGGAGTCGA | TGAAGCTTGG  | GATCTATTTT | GTAGCCTCCC | TCTCAAAGAA | GTGAAGCCTG |
|                      |            |            |            |            |            |             |            |            |            |            |
|                      | 1210       | 1220       | 1230       | 1240       | 1250       | 1260        | 1270       | 1280       | 1290       | 1300       |
| <b>BnaA09g45590D</b> | .... ....  | .... ....  | .... ....  | .... ....  | .... ....  | .... ....   | .... ....  | .... ....  | .... ....  | .... ....  |
|                      | ATGTCAAAAC | ATACACCATA | ATGATTGGAG | GACTATGTAA | GAAAGGCTCG | ATGCTCTAAAG | CGGGCCTGTT | ATTTAAGAAA | ATGGGAGAGG | ATGGGATTGC |
|                      |            |            |            |            |            |             |            |            |            |            |
|                      | 1310       | 1320       | 1330       | 1340       | 1350       | 1360        | 1370       | 1380       | 1390       | 1400       |
| <b>BnaA09g45590D</b> | .... ....  | .... ....  | .... ....  | .... ....  | .... ....  | .... ....   | .... ....  | .... ....  | .... ....  | .... ....  |
|                      | ACCAGATGAT | TGTACATGGA | ACACACTAAT | CCGAGCTCAT | CTCCGAGGTG | GTGACTTAGC  | AACATCAGCT | AACTTATAG  | AAGAAATGAA | GAGTTGTGGG |
|                      |            |            |            |            |            |             |            |            |            |            |
|                      | 1410       | 1420       | 1430       | 1440       | 1450       | 1460        | 1470       | 1480       | 1490       |            |
| <b>BnaA09g45590D</b> | .... ....  | .... ....  | .... ....  | .... ....  | .... ....  | .... ....   | .... ....  | .... ....  | .... ....  |            |
|                      | TTCTCTGCAG | ATGCTTCCAC | GATAAAGATT | GTTATGGATA | TGTTATCGGA | TGGTAGAATG  | AAGAAAAGCT | TTCTGGATTT | GCTTCTTAG  |            |

**Figure S3. Sequence alignment of single functional *RFL11* gene copy in Westar.** The target sequences are shown in underline with the PAM highlighted in red.

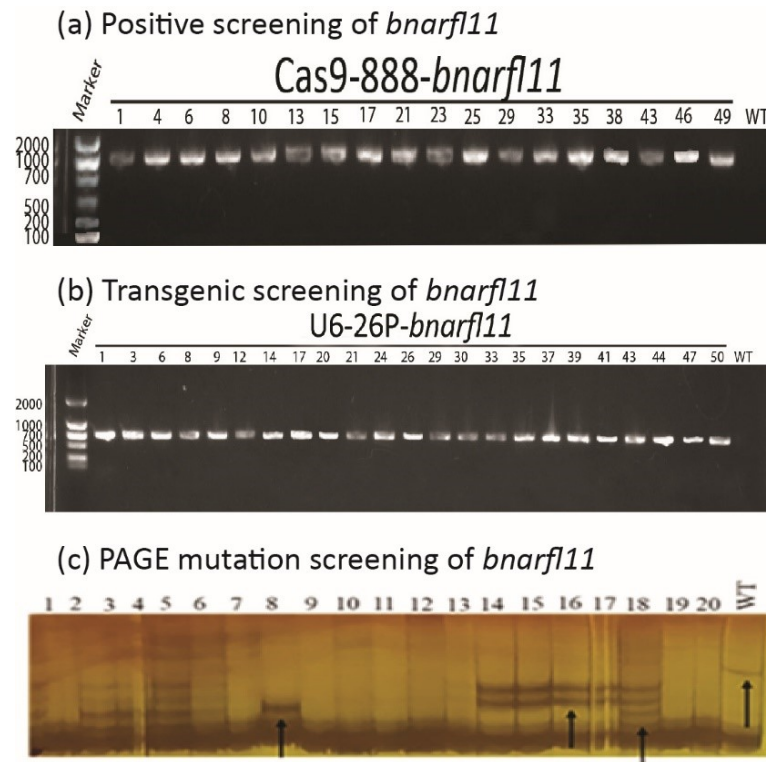

**Figure. S4 Positive, Transgenic and mutation screening in *bnarf11*.** (a) Cas9 specific primers used for positive screening of *bnarf11*. (b) Universal primers used for transgenic screening of *bnarf11*. (c) Polyacrylamide gel electrophoresis for mutation detection, numerous plants showed various bands that differ from the band on non-denaturing PAGE gels in wild-type plants (WT), displaying target sites with some mutation.



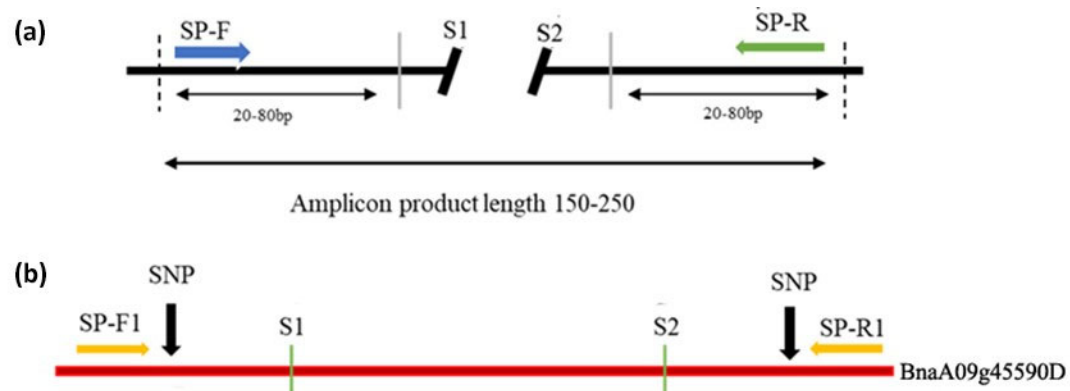

**Figure S5 The *BnaRFL11* gene contains a single copy with two target sites S1 and S2. (a)** in a single copy, forward and reverse primers covered single target sites, and both primers were designed within 20-80 nucleotides from the target sites. The length of the specific primer pair (SP F/R) was 150-250 bp. **(b)** Site-specific primers were designed for each target based on SNP differences.

```

      ....|....|....|....|....|....|....|....|....|....|....|....|....|....|....|....|....|....|....|....|
RFL11  TGATAAAATTCGTGGTGTGGATCTAGTTGTGGGTGAAGGGGAAGAAATCATCAAGTCATGAAGATGGGAGTGGAGTTGTTCTTCTTCTGGTTTATTTA 100
RFL6   TGATAAAATTCGTGGTGTGGATGTTTTGTGG-TGAAGGGGAAGAAATCA--AAGTCATGAAGACGGGAGTGGAGTTGTTCTTCTTCTTCTGGTTTATTTA 97
ClustalConsensus ***** * ***** ***** ***** ***** ***** ***** ***** ***** ***** ***** ***** ***** ***** 93

      110      120      130      140      150      160      170      180      190      200
RFL11  GATTTGAAAAAAACAGACAATGTTGTGTCGGAGATTGGTACGTGAGCCTCGTATCCCTCTGAGTCTTGGAGGTACTCTTACAGTTACATGCTTTGT--TA 198
RFL6   GATTTGAAAAAAACAAACAATGTTGTGTCGGAGATTGGTGTCTGCTCTATCCCCCTGAGTCCGTGTTGGTACTCTTGCAACTCCATCTCTCATCTTA 197
ClustalConsensus ***** ***** ***** * * * ***** ***** * * ***** * * * * * * * * * * * * * * * * * * * * * * 175

      210      220      230      240      250      260      270      280      290      300
RFL11  CAAAGAGAGATTGCGAAGTGGGATCGTCGATATTAAAGAAAGATGAAGCTGTGCTCTGTTTCAAACATGATTGTCTCGTCCTCTTCTTACG--CAA 295
RFL6   CAAAGAGAGACTGAGAAGTGGTCTGGTCGATATCAAGAAGAAGGATGCTGTAGCTCTGTTTCAGTCCATGATTAGGTCTCGTCCTCTTCTTACGAAGCAA 297
ClustalConsensus ***** * * ***** * ***** * * * * * * * * * * * * * * * * * * * * * * * * * * * * * * * * * * * 256

      310      320      330      340      350      360      370      380      390      400
RFL11  ATGGAAATGAATGGGATTGCGCATGACCTCTACACGCTGAGTATTGTATCAACTGCTTCTGCCGTCCGCCGAAACTCGTCACATTCTCAACTTTGATTA 395
RFL6   ATGGAACTGCAAGGGATTGCACATAGCATTTACACGCTGAGTATTATGATCAATTGCTTCTGCCGCTCCAGAACTCGTCACATTCTCAACTTTGATCA 397
ClustalConsensus ***** * * * ***** * * * ***** ***** * * * ***** ***** * * * ***** ***** * * * ***** ***** 340

      410      420      430      440      450      460      470      480      490      500
RFL11  ACGGTTTATGTCTGGGTCGAGTCTCTGAAGCTGTGGAGTTAGTTGATCGTATGGTGGAAATGAAGGTTATTCCAAATCTCATCATCTTAACTCTTGT 495
RFL6   ACGGTTTATGTCTGGGTAGATTTCCAAAGCTGTGGAGTTAGTTGATCATATGGTAGATATGAAGGTTATTCCAAATCTCATCATCTTAACTCTTGT 497
ClustalConsensus ***** ***** * * ***** ***** ***** * * * ***** ***** ***** ***** ***** ***** ***** ***** 432

      510      520      530      540      550      560      570      580      590      600
RFL11  CAATGGACTTTGTCTCCAAGATAGAGTGTCCGAAGCAGTGGCTTTGATAGATCGAATGGTGGCTAATGGATGTCAACCCGATTACCTATGGTCCGATTTT 595
RFL6   CAATGGGCTTTGTCTCCAAGATAGACTCTCTGAAGCAATGTCTTTGATACATCGAATGTTGGCTAATGGGTGCCAACCCGATTACATATGGTCCGGTTTT 597
ClustalConsensus ***** ***** * * ***** * * ***** ***** ***** * * ***** ***** ***** ***** ***** ***** 520

      610      620      630      640      650      660      670      680      690      700
RFL11  GAACAGAATGTGCAATGGAAGATCGAAAGGTCAAGCCTCAAGTATGCGTTGATTGATAGTTTTGTGAAAGAAGGAAAGCTTACTGAGGCTAAAGAGTTG 695
RFL6   GAACAGAATGTGTAATGGAACCTTAGAAAGATCAAGCCTCAAGTATGCTTTGATTGATAGTTTTGTGAAAGAAGGACAGCTTACCGAGGCTAAAAAATTG 697
ClustalConsensus ***** ***** * ***** ***** ***** ***** ***** ***** ***** ***** ***** ***** ***** ***** 610

      710      720      730      740      750      760      770      780      790      800
RFL11  TACAATGAGATGATCGTAAGAGGCTTAGATCCTAATACCATACATATGGTCTCTGATACATGGGCTGTGCATGGAGAATCGCTTAGATGAGGCCAACCC 795
RFL6   TACAATGAGATGATCACAAGAGGCACAGATCCAAATATCATTACATATAACTCTTTGATATATGGGATGTGCATGGACAACGCTAGATGAGGCCAACCC 797
ClustalConsensus ***** ***** ***** * * * ***** ***** ***** ***** ***** ***** ***** ***** ***** ***** 694

      810      820      830      840      850      860      870      880      890      900
RFL11  AGATGTTGGATCTGATGGTTAGCAAGGGATCGCATCCTGATATTTGGACGTATAATATCCTTATAAACGGGTATTGTAAGGCTAAACTGGTTGATGAAGG 895
RFL6   AGATGCTGGATATGATGGTTAGCAAGGGATTCTATCCTGATATTGTGACGTTTAATATCCTTATCAACGGGTACTGTAAGGCTAAACAGGTCGATGAAGG 897

```

```

ClustalConsensus ***** 782
          910      920      930      940      950      960      970      980      990      1000
RFL11      ....|....|....|....|....|....|....|....|....|....|....|....|....|....|....|....|
RFL6      TATGAGACTTTTCCGCAAAATGCTCTGAGAGGAGTGGTTGCAGATACAGTCACCTATAGCAGTCTCATTCAAGGGTTTTGTCAATCAGGAAAACCTAAA 995
ClustalConsensus ** ***** 871
          1010     1020     1030     1040     1050     1060     1070     1080     1090     1100
RFL11      ....|....|....|....|....|....|....|....|....|....|....|....|....|....|....|....|
RFL6      GTCGCCAAAGAACTCTCCAAGAGATGGTCTCTCAAGGTGTTTCATCCTAATATTGTAACCTACAAAATTTTGATGGATGGTCGATGAAGCTTGGGATCTA 1095
ClustalConsensus ** ***** 952
          1110     1120     1130     1140     1150     1160     1170     1180     1190     1200
RFL11      ....|....|....|....|....|....|....|....|....|....|....|....|....|....|....|....|
RFL6      TTTTGTAGCCTCCCTCTCAAAGAAGTGAAGCCTGATGTCAAACATACACCATAATGATTGGAGGACTATGTAAGAAAGGCTCGATGCTTAAAGCGGGCC 1195
ClustalConsensus ** ***** 1039
          1210     1220     1230     1240     1250     1260     1270     1280     1290     1300
RFL11      ....|....|....|....|....|....|....|....|....|....|....|....|....|....|....|....|
RFL6      TGTATTATAAGAAAATGGGAGAGGATGGGATTGCACCGAGTGATTGTACATGGAACACACTAATCCGAGCTCATCTCCGAGGTGGTGACTTAGCAACATC 1295
ClustalConsensus ***** 1120
          1310     1320     1330     1340     1350     1360     1370     1380     1390     1400
RFL11      ....|....|....|....|....|....|....|....|....|....|....|....|....|....|....|....|
RFL6      AGCTAAACTTATAGAAGAAATGAAGAGTTGTGGGTTCTCTGCAGATGCTTCACATAAAGATTGTTATGGATATGTTATGGATGGTAGAATGAAGAAAAGC 1395
ClustalConsensus ***** 1217
          1410     1420
RFL11      ....|....|....|....|
RFL6      TTTCTGGATTGCTTTCTTAG 1415
ClustalConsensus ***** 1237
          1417
RFL6      TTTCTGGATTGCTTTCTTAG 1417

```

**Figure S6. Sequence alignment of *BnaRFL11* with *BnaRFL6*.**
